# Supplementary material
Source: publisher site journal article supplement (https://www.dovepress.com/article/275977)
Supplement: Supplementary file 1 [file get_supplementary_file.php]

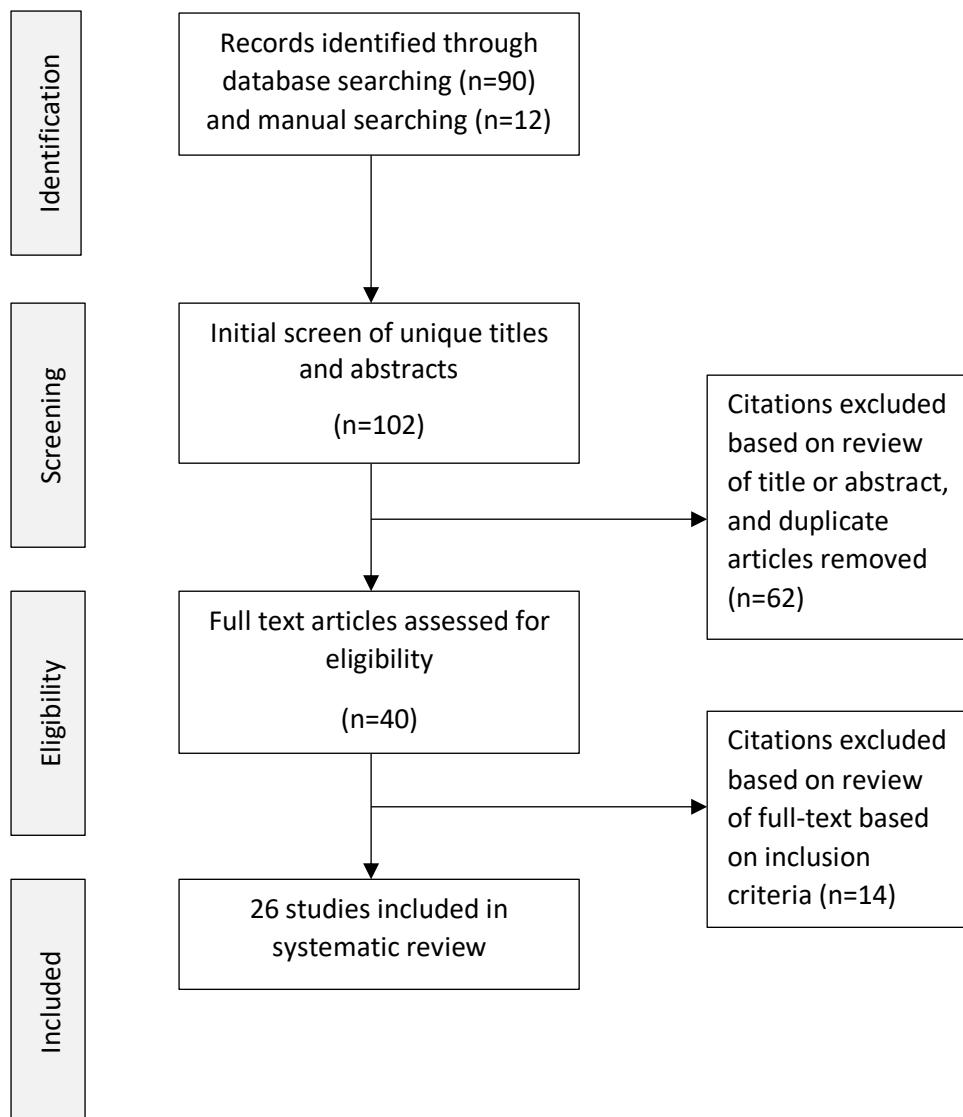

**Supplementary Figure 1.** Flowchart of the process of identifying and selecting included studies. The grey boxes indicate the stage of the selection process; n denotes the number of articles included at each stage of the process.

Table with columns: Study Design, Baseline Characteristics, Results, and Adverse events. Rows include studies such as Gupta et al., Kumar et al., Shoaib et al., Pulphok et al., Minnaji et al., Tan et al., Ross et al., Charvati et al., UK AMD EMR, Bashier et al., Boroah et al., Williams et al., Buckle et al., Raszi et al., Taks et al., Almutaseb et al., Almutaseb et al., Lee et al., Lee et al., Vardarsoo et al., Yang et al., Ozturk et al., Elthenadi et al., Ficher et al., Faller et al., Hama et al., and Chandra et al.

**Supplementary Table 2.** Bias Assessment: Institute of Health Economics (IHE). Quality Appraisal of Case Series Studies Checklist.<sup>27</sup>

| Reference                          | Year  | Study Objective  | Study Design |              |                         | Study Population                  |                                      |                          |
|------------------------------------|-------|------------------|--------------|--------------|-------------------------|-----------------------------------|--------------------------------------|--------------------------|
|                                    |       | Clear Objectives | Prospective  | Multi-Centre | Consecutive Recruitment | Patient Characteristics Described | Clear Inclusion / Exclusion Criteria | Similar Point in Disease |
| Gupta et al. <sup>1</sup>          | 2011  | Yes              | No           | No           | Unclear                 | Yes                               | Yes                                  | Yes                      |
| Kumar et al. <sup>2</sup>          | 2011  | Yes              | Yes          | No           | Yes                     | Yes                               | Yes                                  | Yes                      |
| Shona et al. <sup>3</sup>          | 2011  | Yes              | No           | No           | Unclear                 | Yes                               | Yes                                  | Yes                      |
| Pushpoth et al. <sup>4</sup>       | 2012  | Yes              | No           | No           | Yes                     | Yes                               | Yes                                  | Unclear                  |
| Muniraju et al. <sup>5</sup>       | 2013  | Yes              | No           | No           | Yes                     | Partial                           | Yes                                  | Yes                      |
| Tan et al. <sup>6</sup>            | 2013  | Yes              | No           | No           | Unclear                 | Partial                           | Yes                                  | Yes                      |
| Ross et al. <sup>7</sup>           | 2013  | Yes              | Yes          | No           | Unclear                 | Yes                               | Yes                                  | Yes                      |
| Chavan et al. <sup>8</sup>         | 2014  | Yes              | Yes          | No           | Yes                     | Yes                               | Yes                                  | Yes                      |
| UK AMD EMR <sup>9</sup>            | 2014  | Yes              | No           | Yes          | Unclear                 | Yes                               | Yes                                  | Yes                      |
| Basheer et al. <sup>10</sup>       | 2015  | Yes              | Yes          | No           | Unclear                 | Partial                           | Yes                                  | Yes                      |
| Borooh et al. <sup>11</sup>        | 2015  | Yes              | No           | Yes          | Unclear                 | Partial                           | Yes                                  | Unclear                  |
| Williams et al. <sup>12</sup>      | 2015  | Yes              | Yes          | No           | Yes                     | Partial                           | Yes                                  | Yes                      |
| Buckle et al. <sup>13</sup>        | 2016  | Yes              | No           | No           | Unclear                 | Yes                               | Yes                                  | Yes                      |
| Razi et al. <sup>14</sup>          | 2016  | Yes              | No           | No           | Yes                     | Yes                               | Yes                                  | Yes                      |
| Talks et al. <sup>15</sup>         | 2016  | Yes              | No           | Yes          | Unclear                 | Yes                               | Yes                                  | Yes                      |
| Almuhtaseb et al. <sup>16</sup>    | 2017a | Yes              | No           | No           | Unclear                 | Yes                               | Yes                                  | Yes                      |
| Almuhtaseb et al. <sup>17</sup>    | 2017b | Yes              | No           | Yes          | Unclear                 | Yes                               | Yes                                  | Yes                      |
| Lee et al. <sup>18</sup>           | 2017  | Yes              | No           | Yes          | Unclear                 | Yes                               | Yes                                  | Yes                      |
| Vardarinos et al. <sup>19</sup>    | 2017  | Yes              | No           | No           | Unclear                 | Yes                               | Yes                                  | Yes                      |
| Yang et al. <sup>20</sup>          | 2017  | Yes              | Partial      | Yes          | Unclear                 | Yes                               | Yes                                  | Yes                      |
| Ozturk et al. <sup>21</sup>        | 2018  | Yes              | No           | No           | Unclear                 | Yes                               | Yes                                  | Yes                      |
| Eleftheriadou et al. <sup>22</sup> | 2018  | Yes              | No           | No           | Yes                     | Yes                               | Yes                                  | Yes                      |
| Fulcher et al. <sup>23</sup>       | 2019  | Yes              | No           | No           | Unclear                 | Yes                               | Yes                                  | Yes                      |
| Fasler et al. <sup>24</sup>        | 2019  | Yes              | No           | No           | Unclear                 | Yes                               | Yes                                  | Yes                      |
| Horner et al. <sup>25</sup>        | 2019  | Yes              | No           | No           | Yes                     | Yes                               | Yes                                  | Yes                      |
| Chandra et al. <sup>26</sup>       | 2020  | Yes              | No           | No           | Yes                     | Yes                               | Yes                                  | Yes                      |

| Reference                          | Year | Intervention and co-intervention |                                    | Outcome Measures                  |                          |                              |                               | Statistical Analysis          |
|------------------------------------|------|----------------------------------|------------------------------------|-----------------------------------|--------------------------|------------------------------|-------------------------------|-------------------------------|
|                                    |      | Intervention Described Clearly   | Co-Interventions Described Clearly | <i>A priori</i> outcomes measures | Masked Outcome Assessors | Appropriate Outcome Measures | Before and After Intervention | Appropriate Statistical Tests |
| Gupta et al. <sup>1</sup>          | 2011 | Yes                              | Yes                                | Yes                               | No                       | Yes                          | Yes                           | Yes                           |
| Kumar et al. <sup>2</sup>          | 2011 | Yes                              | Yes                                | Yes                               | No                       | Yes                          | Yes                           | Yes                           |
| Shona et al. <sup>3</sup>          | 2011 | Yes                              | Yes                                | Yes                               | No                       | Yes                          | Yes                           | Yes                           |
| Pushpoth et al. <sup>4</sup>       | 2012 | Yes                              | Yes                                | Yes                               | No                       | Yes                          | Yes                           | Yes                           |
| Muniraju et al. <sup>5</sup>       | 2013 | Yes                              | Yes                                | Yes                               | No                       | Yes                          | Yes                           | Yes                           |
| Tan et al. <sup>6</sup>            | 2013 | Yes                              | Yes                                | Yes                               | No                       | Yes                          | Yes                           | Yes                           |
| Ross et al. <sup>7</sup>           | 2013 | Yes                              | Yes                                | Yes                               | No                       | Yes                          | Yes                           | Yes                           |
| Chavan et al. <sup>8</sup>         | 2014 | Yes                              | Yes                                | Yes                               | No                       | Yes                          | Yes                           | Yes                           |
| UK AMD EMR <sup>9</sup>            | 2014 | Yes                              | Yes                                | Yes                               | No                       | Yes                          | Yes                           | Yes                           |
| Basheer et al. <sup>10</sup>       | 2015 | Yes                              | Yes                                | Yes                               | No                       | Yes                          | Yes                           | Unclear                       |
| Borooah et al. <sup>11</sup>       | 2015 | Yes                              | Yes                                | Yes                               | No                       | Yes                          | Yes                           | Yes                           |
| Williams et al. <sup>12</sup>      | 2015 | Yes                              | Yes                                | Yes                               | No                       | Yes                          | Yes                           | Unclear                       |
| Buckle et al. <sup>13</sup>        | 2016 | Yes                              | Yes                                | Yes                               | No                       | Yes                          | Yes                           | Yes                           |
| Razi et al. <sup>14</sup>          | 2016 | Yes                              | Yes                                | Yes                               | No                       | Yes                          | Yes                           | Unclear                       |
| Talks et al. <sup>15</sup>         | 2016 | Yes                              | Yes                                | Yes                               | No                       | Yes                          | Yes                           | Yes                           |
| Almuhtaseb et al. <sup>16</sup>    | 2017 | Yes                              | Yes                                | Yes                               | No                       | Yes                          | Yes                           | Yes                           |
| Almuhtaseb et al. <sup>17</sup>    | 2017 | Yes                              | Yes                                | Yes                               | No                       | Yes                          | Yes                           | Yes                           |
| Lee et al. <sup>18</sup>           | 2017 | Yes                              | Yes                                | Yes                               | No                       | Yes                          | Yes                           | Yes                           |
| Vardarinos et al. <sup>19</sup>    | 2017 | Yes                              | Yes                                | Yes                               | No                       | Yes                          | Yes                           | Yes                           |
| Yang et al. <sup>20</sup>          | 2017 | Yes                              | Yes                                | Yes                               | No                       | Yes                          | Yes                           | Yes                           |
| Ozturk et al. <sup>21</sup>        | 2018 | Yes                              | Yes                                | Yes                               | No                       | Yes                          | Yes                           | Yes                           |
| Eleftheriadou et al. <sup>22</sup> | 2018 | Yes                              | Yes                                | Yes                               | No                       | Yes                          | Yes                           | Yes                           |
| Fulcher et al. <sup>23</sup>       | 2019 | Yes                              | Yes                                | Yes                               | No                       | Yes                          | Yes                           | Yes                           |
| Fasler et al. <sup>24</sup>        | 2019 | Yes                              | Yes                                | Yes                               | No                       | Yes                          | Yes                           | Yes                           |
| Horner et al. <sup>25</sup>        | 2019 | Yes                              | Yes                                | Yes                               | No                       | Yes                          | Yes                           | Yes                           |
| Chandra et al. <sup>26</sup>       | 2020 | Yes                              | Yes                                | Yes                               | No                       | Yes                          | Yes                           | Yes                           |

| Reference                          | Year | Results and Conclusions |                              |                                 |                |                                  | Competing interests and sources of support | Domains completed |
|------------------------------------|------|-------------------------|------------------------------|---------------------------------|----------------|----------------------------------|--------------------------------------------|-------------------|
|                                    |      | Follow-up Long Enough   | Losses to Follow-up Reported | Estimates of Random Variability | Adverse Events | Conclusions Supported by Results | Competing Interests Reported               |                   |
| Gupta et al. <sup>1</sup>          | 2011 | Yes                     | Yes                          | Yes                             | Partial        | Yes                              | Partial                                    | 15.5              |
| Kumar et al. <sup>2</sup>          | 2011 | Yes                     | Yes                          | Yes                             | Partial        | Yes                              | Partial                                    | 17                |
| Shona et al. <sup>3</sup>          | 2011 | Yes                     | Yes                          | Yes                             | Partial        | Yes                              | Partial                                    | 15.5              |
| Pushpoth et al. <sup>4</sup>       | 2012 | Yes                     | Yes                          | Yes                             | Partial        | Yes                              | Yes                                        | 16                |
| Muniraju et al. <sup>5</sup>       | 2013 | Yes                     | Yes                          | Yes                             | No             | Yes                              | Partial                                    | 15                |
| Tan et al. <sup>6</sup>            | 2013 | Yes                     | Yes                          | Yes                             | No             | Yes                              | No                                         | 14                |
| Ross et al. <sup>7</sup>           | 2013 | Yes                     | Yes                          | Yes                             | Partial        | Yes                              | Partial                                    | 16.5              |
| Chavan et al. <sup>8</sup>         | 2014 | Yes                     | Yes                          | Yes                             | No             | Yes                              | Partial                                    | 16.5              |
| UK AMD EMR <sup>9</sup>            | 2014 | Yes                     | Yes                          | Yes                             | Partial        | Yes                              | Partial                                    | 17                |
| Basheer et al. <sup>10</sup>       | 2015 | Yes                     | Yes                          | Partial                         | No             | Yes                              | Yes                                        | 15                |
| Borooah et al. <sup>11</sup>       | 2015 | Yes                     | Yes                          | Yes                             | No             | Yes                              | Yes                                        | 15.5              |
| Williams et al. <sup>12</sup>      | 2015 | Yes                     | Yes                          | Partial                         | No             | Yes                              | Partial                                    | 15                |
| Buckle et al. <sup>13</sup>        | 2016 | Yes                     | Yes                          | Partial                         | Partial        | Yes                              | Partial                                    | 15                |
| Razi et al. <sup>14</sup>          | 2016 | Yes                     | Yes                          | Partial                         | Partial        | Yes                              | Partial                                    | 15                |
| Talks et al. <sup>15</sup>         | 2016 | Yes                     | Yes                          | Yes                             | No             | Yes                              | Yes                                        | 16.5              |
| Almuhtaseb et al. <sup>16</sup>    | 2017 | Yes                     | Yes                          | Partial                         | No             | Yes                              | Partial                                    | 14.5              |
| Almuhtaseb et al. <sup>17</sup>    | 2017 | Yes                     | Yes                          | Yes                             | No             | Yes                              | Yes                                        | 16.5              |
| Lee et al. <sup>18</sup>           | 2017 | Yes                     | Yes                          | Yes                             | No             | Yes                              | Yes                                        | 16.5              |
| Vardarinos et al. <sup>19</sup>    | 2017 | Yes                     | Yes                          | Yes                             | Yes            | Yes                              | Yes                                        | 16.5              |
| Yang et al. <sup>20</sup>          | 2017 | Yes                     | Yes                          | Yes                             | No             | Yes                              | Yes                                        | 17                |
| Ozturk et al. <sup>21</sup>        | 2018 | Yes                     | Yes                          | Yes                             | No             | Yes                              | Yes                                        | 15.5              |
| Eleftheriadou et al. <sup>22</sup> | 2018 | Yes                     | Yes                          | Yes                             | No             | Yes                              | Yes                                        | 16                |
| Fulcher et al. <sup>23</sup>       | 2019 | Yes                     | Yes                          | Yes                             | No             | Yes                              | Yes                                        | 15.5              |
| Fasler et al. <sup>24</sup>        | 2019 | Yes                     | Yes                          | Yes                             | No             | Yes                              | Yes                                        | 15.5              |
| Horner et al. <sup>25</sup>        | 2019 | Yes                     | Yes                          | Yes                             | No             | Yes                              | Yes                                        | 16                |
| Chandra et al. <sup>26</sup>       | 2020 | Yes                     | Yes                          | Yes                             | Partial        | Yes                              | Yes                                        | 16.5              |

## References

1. Gupta B, Adewoyin T, Patel SK, Sivaprasad S. Comparison of two intravitreal ranibizumab treatment schedules for neovascular age-related macular degeneration. *Br J Ophthalmol* 2011; **95**(3): 386-390.
2. Kumar A, Sahni JN, Stangos AN, Campa C, Harding SP. Effectiveness of ranibizumab for neovascular age-related macular degeneration using clinician-determined retreatment strategy. *Br J Ophthalmol* 2011; **95**(4): 530-533.
3. Shona O, Gupta B, Vemala R, Sivaprasad S. Visual acuity outcomes in ranibizumab-treated neovascular age-related macular degeneration; stratified by baseline vision. *Clin Exp Ophthalmol* 2011; **39**(1): 5-8.
4. Pushpoth S, Sykakis E, Merchant K, Browning AC, Gupta R, Talks SJ. Measuring the benefit of 4 years of intravitreal ranibizumab treatment for neovascular age-related macular degeneration. *Br J Ophthalmol* 2012; **96**(12): 1469-1473.
5. Muniraju R, Ramu J, Sivaprasad S. Three-year visual outcome and injection frequency of intravitreal ranibizumab therapy for neovascular age-related macular degeneration. *Ophthalmologica* 2013; **230**(1): 27-33.
6. Tan SZ, Laude A, Aspinall PA, Ambrecht AM, Vani A, Dhillon B. Decisional answer tree analysis of exudative age-related macular degeneration treatment outcomes. *Int Ophthalmol* 2013; **33**(5): 467-474.
7. Ross AH, Donachie PH, Sallam A, Stratton IM, Mohamed Q, Scanlon PH *et al*. Which visual acuity measurements define high-quality care for patients with neovascular age-related macular degeneration treated with ranibizumab? *Eye (Lond)* 2013; **27**(1): 56-64.
8. Chavan R, Panneerselvam S, Adhana P, Narendran N, Yang Y. Bilateral visual outcomes and service utilization of patients treated for 3 years with ranibizumab for neovascular age-related macular degeneration. *Clin Ophthalmol* 2014; **8**: 717-723.
9. The neovascular age-related macular degeneration database: multicenter study of 92 976 ranibizumab injections: report 1: visual acuity. *Ophthalmology* 2014; **121**(5): 1092-1101.
10. Basheer K, Mensah E, Khanam T, Minakaran N. Visual outcomes of age-related macular degeneration patients undergoing intravitreal ranibizumab monotherapy in an urban population. *Clin Ophthalmol* 2015; **9**: 959-965.

11. Boroovah S, Jeganathan VS, Ambrecht AM, Oladiwura D, Gavin M, Dhillon B *et al.* Long-term visual outcomes of intravitreal ranibizumab treatment for wet age-related macular degeneration and effect on blindness rates in south-east Scotland. *Eye (Lond)* 2015; **29**(9): 1156-1161.
12. Williams GS, Seow E, Evans H, Owoniyi M, Evans S, Blyth C. Factors affecting visual acuity after one year of follow up after repeated intravitreal ranibizumab for macular degeneration. *Saudi J Ophthalmol* 2015; **29**(3): 187-191.
13. Buckle M, Donachie PH, Johnston RL. Long-term outcomes of intravitreal ranibizumab for neovascular age-related macular degeneration in a well defined region of the UK. *Br J Ophthalmol* 2016; **100**(2): 240-245.
14. Razi F, Haq A, Tonne P, Logendran M. Three-year follow-up of ranibizumab treatment of wet age-related macular degeneration: influence of baseline visual acuity and injection frequency on visual outcomes. *Clin Ophthalmol* 2016; **10**: 313-319.
15. Talks JS, Lotery AJ, Ghanchi F, Sivaprasad S, Johnston RL, Patel N *et al.* First-Year Visual Acuity Outcomes of Providing Aflibercept According to the VIEW Study Protocol for Age-Related Macular Degeneration. *Ophthalmology* 2016; **123**(2): 337-343.
16. Almuhtaseb H, Kanavati S, Rufai SR, Lotery AJ. One-year real-world outcomes in patients receiving fixed-dosing aflibercept for neovascular age-related macular degeneration. *Eye (Lond)* 2017; **31**(6): 878-883.
17. Almuhtaseb H, Johnston RL, Talks JS, Lotery AJ. Second-year visual acuity outcomes of nAMD patients treated with aflibercept: data analysis from the UK Aflibercept Users Group. *Eye (Lond)* 2017; **31**(11): 1582-1588.
18. Lee AY, Lee CS, Egan CA, Bailey C, Johnston RL, Natha S *et al.* UK AMD/DR EMR REPORT IX: comparative effectiveness of predominantly as needed (PRN) ranibizumab versus continuous aflibercept in UK clinical practice. *Br J Ophthalmol* 2017; **101**(12): 1683-1688.
19. Vardarinos A, Gupta N, Janjua R, Iron A, Empeslidis T, Tsaousis KT. 24-month clinical outcomes of a treat-and-extend regimen with ranibizumab for wet age-related macular degeneration in a real life setting. *BMC Ophthalmol* 2017; **17**(1): 58.
20. Yang Y, Downey L, Mehta H, Mushtaq B, Narendran N, Patel N *et al.* Resource Use and Real-World Outcomes for Ranibizumab Treat and Extend for Neovascular Age-Related Macular Degeneration in the UK: Interim Results from TERRA. *Ophthalmol Ther* 2017; **6**(1): 175-186.

21. Ozturk M, Harris ML, Nguyen V, Barthelmes D, Gillies MC, Mehta H. Real-world visual outcomes in patients with neovascular age-related macular degeneration receiving aflibercept at fixed intervals as per UK licence. *Clin Exp Ophthalmol* 2018; **46**(4): 407-411.
22. Eleftheriadou M, Vazquez-Alfageme C, Citu CM, Crosby-Nwaobi R, Sivaprasad S, Hykin P *et al.* Long-Term Outcomes of Aflibercept Treatment for Neovascular Age-Related Macular Degeneration in a Clinical Setting. *Am J Ophthalmol* 2017; **174**: 160-168.
23. Fulcher C, Hazel CA, Pacey I, Ali H, Ghanchi FD. Predicting visual outcomes in patients treated with aflibercept for neovascular age-related macular degeneration: Data from a real-world clinical setting. *Eur J Ophthalmol* 2020; **30**(3): 543-549.
24. Fasler K, Moraes G, Wagner S, Kortuem KU, Chopra R, Faes L *et al.* One- and two-year visual outcomes from the Moorfields age-related macular degeneration database: a retrospective cohort study and an open science resource. *BMJ Open* 2019; **9**(6): e027441.
25. Horner F, Lip PL, Clark H, Chavan R, Sarmad A, Mushtaq B. Real-World Visual And Clinical Outcomes For Patients With Neovascular Age-Related Macular Degeneration Treated With Intravitreal Ranibizumab: An 8-Year Observational Cohort (AMD8). *Clin Ophthalmol* 2019; **13**: 2461-2467.
26. Chandra S, Rasheed R, Menon D, Patrao N, Lamin A, Gurudas S *et al.* Impact of injection frequency on 5-year real-world visual acuity outcomes of aflibercept therapy for neovascular age-related macular degeneration. *Eye (Lond)* 2020. Epub ahead of print.
27. Guo B, Moga C, Harstall C, Schopflocher D. A principal component analysis is conducted for a case series quality appraisal checklist. *J Clin Epidemiol.* 2016; **69**:199-207.e2.
